# Supplementary material
Source: publisher figshare collection journal article supplement (https://karger.figshare.com/ndownloader/files/27907974)
Supplement: Supplementary file 1 [file 27907974]

**Supplement to:**

***Long-term Treatment with Telotristat Ethyl in Patients with Carcinoid Syndrome Symptoms: Results from the TELEPATH Study***

Dieter Hörsch, Lowell Anthony, David J. Gross, Juan W. Valle, Staffan Welin, Marta Benavent, Martyn Caplin, Marianne Pavel, Emily Bergsland, Kjell Öberg, Kenneth B. Kassler-Taub, Polina Binder, Phillip Banks, Pablo Lapuerta, Matthew H. Kulke

**List of Independent Ethics Committees (IEC) or Institutional Review Boards (IRB) and Principal Investigators at Each Study Site**

Hadassah Ein Kerem MC Kiryat Hadassah

POB 12000

Jerusalem 91120

Israel

Principal Investigator: Prof. David Gross

Institutional Review Board Dana-Farber Cancer Institute

Dana-Farber/Harvard Cancer Center

450 Brookline Avenue, OS229

Boston, Massachusetts 02215

United States

Principal Investigator: Matthew Kulke, MD

Western IRB

South Hill Business & Technology Center

1019 39th Ave. S.E.

Puyallup, Washington 98374

United States

Principal Investigator: Joseph Dillon, MD

Stanford Institutional Review Board

3000 El Camino Real

Five Palo Alto Square, 4th floor

Palo Alto, California 94306

United States

Principal Investigator: Pamela Kunz, MD

Integ Review

3001 S. Lamar Boulevard Suite 210

Austin, Texas 78704

United States

Principal Investigator: Matthew Eves, MD

University of Kentucky Medical Institutional Review Board

Office of Research Integrity

315 Kinkead Hall

Lexington, Kentucky 40506-0057

United States

Principal Investigator: Lowell Anthony, MD

Icahn School of Medicine at Mount Sinai Program for the Protection of Human Subjects

One Gustave L. Levy Place

Box 1081

New York, New York 10029

United States

Principal Investigator: Michelle K. Kim, MD, replaced by Richard R.P. Warner, MD

University of Pennsylvania Office of Regulatory Affairs

3600 Market Street Suite 301-S

Philadelphia, Pennsylvania 19104

United States

Principal Investigator: David C. Metz, MD

Comité d’éthique, CHU Dinant Godinne / UCL Namur

Avenue Dr. G Thérasse 1

Yvoir B-5530

Belgium

Principal Investigator: Prof. Dr. Lionel D’Hondt

Comité d’éthique

Cliniques Universitaires de Mont-Godinne

Avenue Dr. G Thérasse 1

Yvoir 5530

Belgium

Principal Investigator: Prof. Dr. Marc Peeters

Ethisch Comité, UZGent 1K4

De Pintelaan 185

Gent 9000

Belgium

Principal Investigator: Prof. Dr. Karen Geboes

Landesamt für Gesundheit und Soziales (LAGeSo)

Fehrbelliner Platz 1

10707 Berlin

Postanschrift: Postfach 31 09 29

10639 Berlin

Germany

Principal Investigator: Dr. Ulrich-Frank Pape (NCI), replaced by Prof. Dr. med Marianne Pavel

Ethikkommission des FB Medizin der Phillips – Universität Marburg

Baldingerstraße 35032

Marburg

Germany

Principal Investigator: Dr. Anja Rinke

Ethikkommission der Landesärztekammer Thüringen

Im Semmicht 33

07751 Jena

Germany

Principal Investigator: Prof. Dr. med. Dieter Hӧrsch, MD

Geschäftsstelle der Ethikkommission der Medizinischen

Fakultät der Universität Duisburg-Essen

Universitätsklinikum Essen Robert-Koch-Str. 9-11

45147 Essen

Germany

Principal Investigator: Dr. Harald Lahner

Ethikkommission der Ärztekammer Hamburg Weidestr. 122b

22083 Hamburg

Germany

Principal Investigator: Dr. Jörg Schrader, replaced by PD Dr. med Daniel Benten

National Research Ethics Service (NRES) Committee London – Brent

80 London Road

Skipton House

London SE1 6LH

United Kingdom

Principal Investigator: Dr. Martyn Caplin

National Research Ethics Service (NRES) Committee London – Brent

80 London Road

Skipton House

London SE1 6LH

United Kingdom

Principal Investigator: Prof. Juan Valle

National Research Ethics Service (NRES) Committee London – Brent

80 London Road

Skipton House

London SE1 6LH

United Kingdom

Principal Investigator: Prof. John Ramage

National Research Ethics Service (NRES) Committee London – Brent

80 London Road

Skipton House

London SE1 6LH

United Kingdom

Principal Investigator: Dr. Petros Perros

National Research Ethics Service (NRES) Committee London – Brent

80 London Road

Skipton House

London SE1 6LH

United Kingdom

Principal Investigator: Dr. Martin Weickert

National Research Ethics Service (NRES) Committee London – Brent

80 London Road

Skipton House

London SE1 6LH

United Kingdom

Principal Investigator: Prof. Andrea Frilling

National Research Ethics Service (NRES) Committee London – Brent

80 London Road

Skipton House

London SE1 6LH

United Kingdom

Principal Investigator: Dr. Rajaventhan Srirajaskanthan

National Research Ethics Service (NRES) Committee London – Brent

80 London Road

Skipton House

London SE1 6LH

United Kingdom

Principal Investigator: Prof. Nicholas Reed

Medisch Ethische Toetsingscommissie Maxima Medisch Centrum

De Run 4600

Postbus 7777

Veldhoven

Noord-Brabant 5504 DB

The Netherlands

Principal Investigator: Dr. M.W. Dercksen, MD, PhD

Medisch Ethische Toetsingscommissie Maxima Medisch Centrum

De Run 4600

5504 DB Veldhoven

The Netherlands

Principal Investigator: M.E.T. Tesselaar, MD. PhD

Medisch Ethische Toetsingscommissie Maxima Medisch Centrum

De Run 4600

5504 DB Veldhoven

The Netherlands

Principal Investigator: Dr. Heinz-Josef Klumpen

Capital Health Research Ethics Board

5790 University Avenue, Room 118

Halifax, Nova Scotia B3H 1V7

Canada

Principal Investigator: Daniel Rayson, MD

HREBA Cancer Committee

c/o Alberta Health Innovates – Health Solutions

1500, 10104 – 103rd Avenue NW

Edmonton, Alberta T5J 4A7

Canada

Principal Investigator: Dr. Janice Pasieka

Reginala etikprövningsnämnden i Uppsala

Box 1964

Uppsala 751 49

Sweden

Principal Investigator: Staffan Welin, MD

Regionala etikprövningsnämnden i Uppsala

Segerstedthuset

von Kraemers allé 4

75237 Uppsala

Sweden

Post address:

Box 1964

751 49 Uppsala

Sweden

Principal Investigator: Elisabeth Rasmusson, MD

Comité de Protection des Personnes ILE DE FRANCE 1

1 Place du Parvis Notre-Dame

Paris Cedex 04 75181

France

Principal Investigator: Dr. Eric Baudin

Comité de Protection des Personnes ILE DE FRANCE 1

1 Place du Parvis Notre-Dame

Paris Cedex 04 75181

France

Principal Investigator: Dr. Catherine Lombard-Bohas

Comité de Protection des Personnes ILE DE FRANCE 1

1 Place du Parvis Notre-Dame

Paris Cedex 04 75181

France

Principal Investigator: Dr. Christine Do Cao

HREC:

Central Adelaide Local Health Network HREC CALHN Research Office

Level 3 Roma Mitchell House

136 North Terrace

Adelaide SA 500

Australia

Principal Investigator: Prof. Timothy Price

RGO: Northern Sydney Local Health District Research Office

Kolling Building, Level 3

Royal North Shore Hospital

St Leonards, NSW 2065

Australia

Principal Investigator: Dr. Nick Pavlakis

RGO: Queensland Government

Royal Brisbane and Women’s Hospital Butterfield Street

Herston-4029

Australia

Principal Investigator: Dr. David Wyld

Human Research Ethics Committee (TQEH/LMH/MH)

Basil Hetzel Institute DX465101

The Queen Elizabeth Hospital

28 Woodville Road

Woodville South, 5011

Australia

Principal Investigator: Professor Rodney J. Hicks

Comitato Etico Interaziendale Azienda Ospedaliera Universitaria San Luigi Gonzaga Regione

Gonzole 10

Orbassano Torino 10043

Italy

Principal Investigator: Massimo Terzolo, MD

Comitato Etico Area Vasta Nord Ovest

c/o Azienda Ospedaliero Universitaria di Pisa

Via Roma 67

56126 Pisa

Italy

Principal Investigator: Fausto Bogazzi, MD

Comitato Etico

Istituto Europeo di Oncologia

Via Ripamonti 435

20141 Milano

Italy

Principal Investigator: Nicola Fazio, MD

Comitato Etico

Istituto Clinico Humanitas

Via Manzoni 56

20089 Rozzano (Milano)

Italy

Principal Investigator: Valeria Smiroldo, MD

CEIC Hospital Universitario Ramón y Cajal

Carretera de Colmenar Viejo, km. 9

1 Madrid 28034

Spain

Principal Investigator: Dr. Marta Benavent Viñueles, replaced by Dra. Rocio Garcia Carbonero

CEIC Hospital Universitario Ramón y Cajal

Carretera de Colmenar Viejo, km. 9,

1 Madrid 28034

Spain

Principal Investigator: Dr. Teresa Alonso Gordoa, replaced by Dr. Enrique Grande Pulido

CEIC Hospital Universitario Ramón y Cajal

Carretera de Colmenar Viejo, km. 9

1 Madrid 28034

Spain

Principal Investigator: Dr. Jaume Capdevila Castillón
